# Supplementary material for: Flazin as a Lipid Droplet Regulator against Lipid Disorders
Source: MDPI journal article supplement (doi:10.3390/nu14071501), 2022-04-03
Supplement: s1 [file s1]

## Supplementary Material

### Preparation of flazin by chemical synthesis

For the synthesis of flazin, 2.18 mL of  $\text{SOCl}_2$  was added into 50 mL of methanol containing 10 mmol of L-tryptophan, and the solution was stirred overnight. The pH of the solution was adjusted to 9–10 by adding NaOH aqueous solution, and the solution was extracted with ethyl acetate. Organic layers were collected and evaporated to give compound 2. Then, 1 mmol of compound 2 was added into 10 mL of  $\text{CH}_2\text{Cl}_2$  containing 1 mmol of 5-(hydroxymethyl)furfural and 80  $\mu\text{L}$  of trifluoroacetate (TFA). The mixture was stirred for 3 h and then neutralized with triethylamine (TEA). Another 0.5 mL of TEA and 1 mmol of trichloroisocyanuric acid was added, and the mixture was stirred for 2 h. The solution was extracted with ethyl acetate. Organic layers were collected and evaporated to give compound 4. Next, compound 4 (1 mmol) was dissolved in 5 mL of methanol, and NaOH aqueous solution (3 mol/L, 1 mL) was added. The mixture was heated to 65  $^\circ\text{C}$  and stirred for 5 h. Afterward, citric acid was added to adjust the pH to 4–5. Then, the solution was extracted with ethyl acetate. The collected organic layer was purified using flash chromatography to yield the final product (flazin).

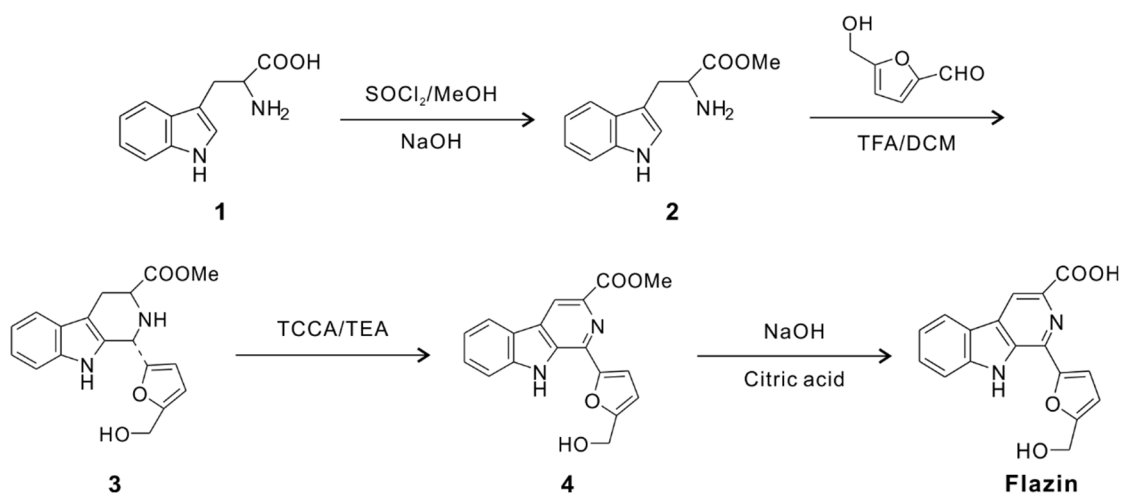

**Figure S1.** Synthetic route of flazin.

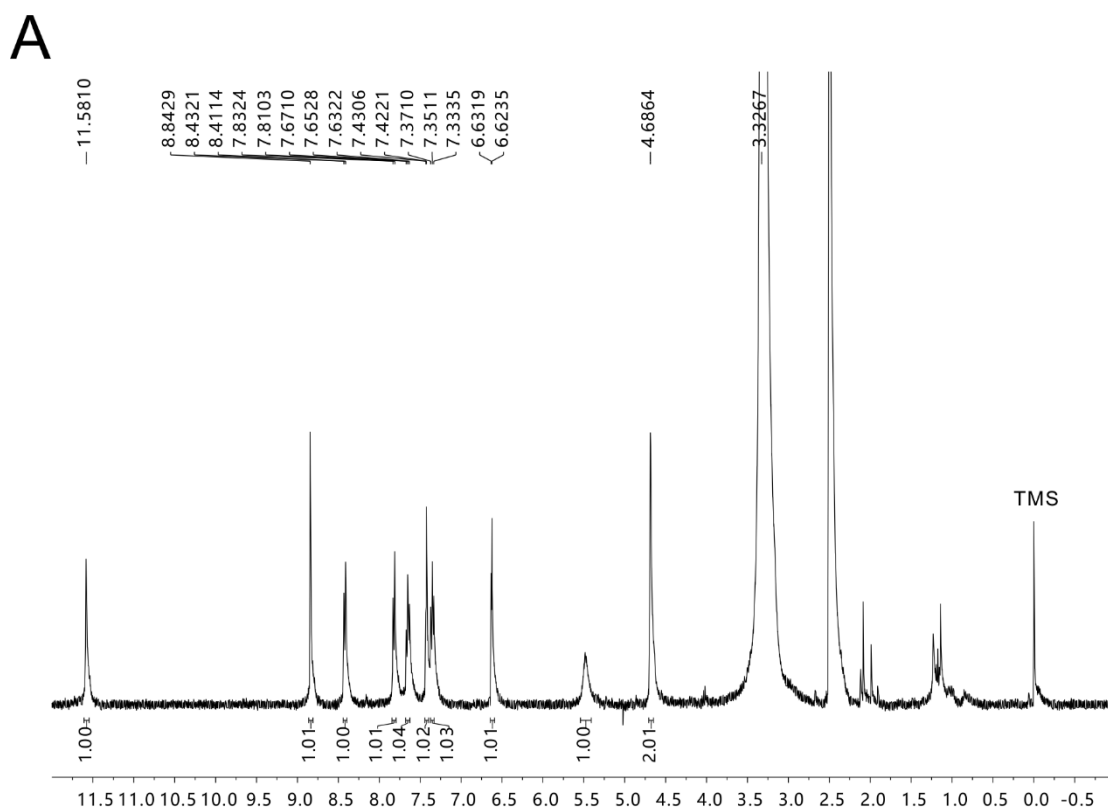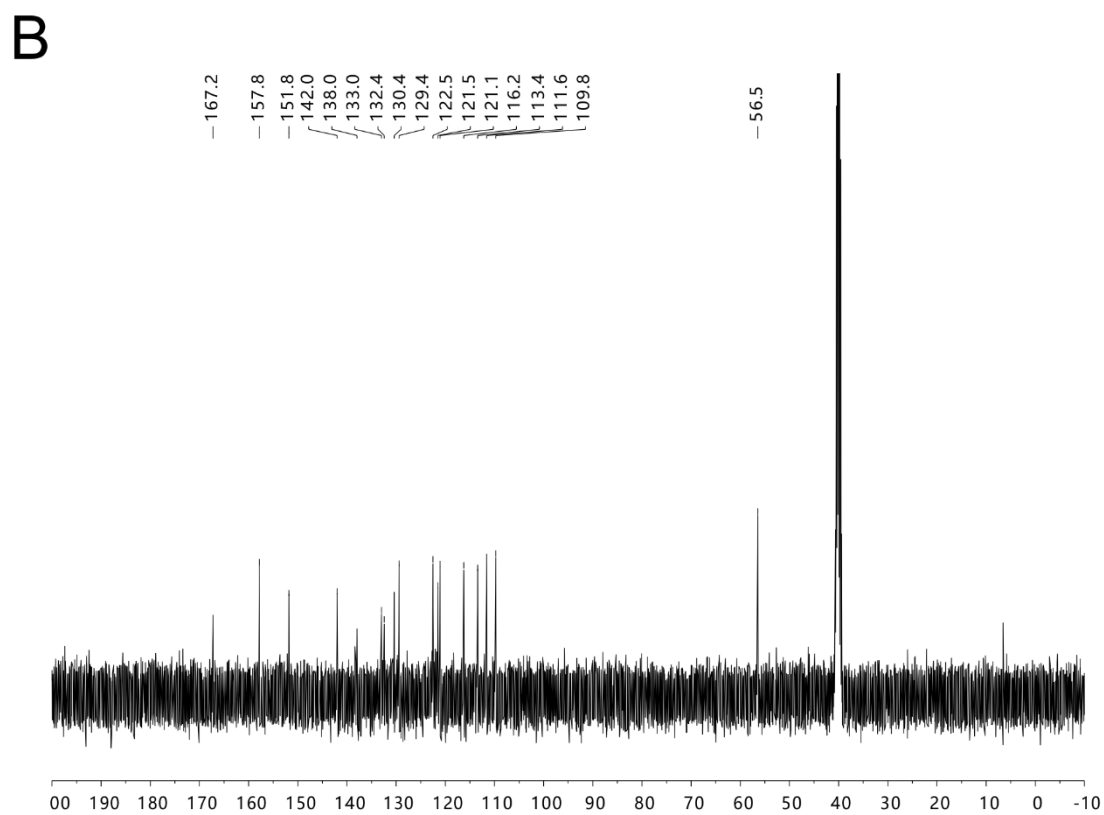

**Figure S2.** (A)  $^1\text{H}$  NMR spectrum and (B)  $^{13}\text{C}$  NMR of the prepared flazin.

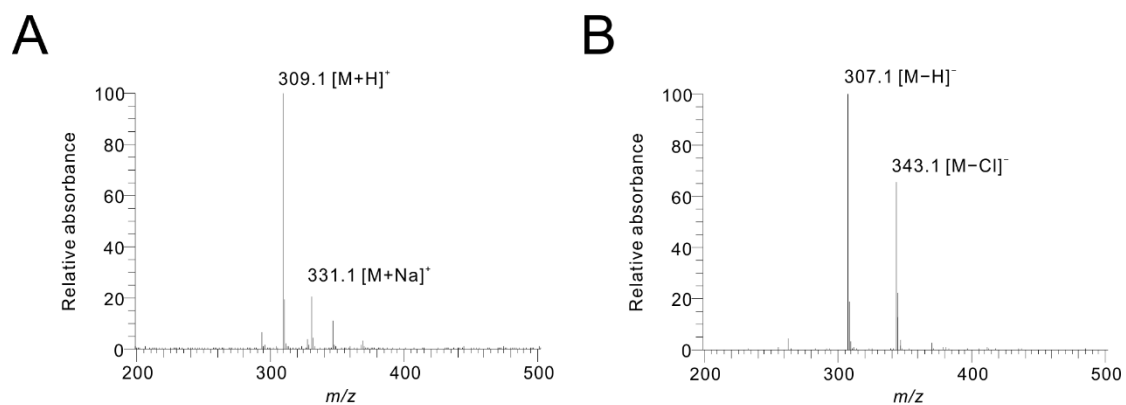

**Figure S3.** ESI-MS of the prepared flazin in (A) positive mode and (B) negative mode.

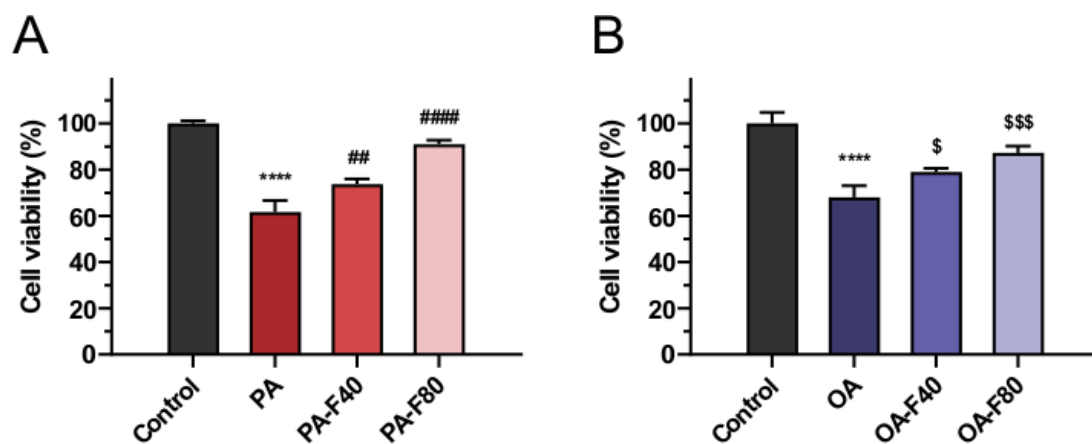

**Figure S4.** Viabilities of cells treated with flazin and fatty acids. PA, 400  $\mu$ M palmitic acid; PA-F40, 400  $\mu$ M palmitic acid + 40  $\mu$ M flazin; PA-F80, 400  $\mu$ M palmitic acid + 80  $\mu$ M flazin; OA, 800  $\mu$ M oleic acid; OA-F40, 800  $\mu$ M oleic acid + 40  $\mu$ M flazin; OA-F80, 800  $\mu$ M oleic acid + 80  $\mu$ M flazin. \*\*\*\*  $p < 0.0001$  vs. control, ##  $p < 0.01$ , ####  $p < 0.0001$  vs. PA group, \$  $p < 0.05$ , \$\$\$  $p < 0.001$  vs. OA group (n = 3).

**Table S1.** Content of TG and FFA species by LC/MS (means  $\pm$  SD, pmol/mg protein).

| <b>Li-<br/>pid<br/>spe-<br/>cies</b> | <b>Control</b>    | <b>PA</b>          | <b>PA-F40</b>      | <b>PA-F80</b>      | <b>OA</b>          | <b>OA-F40</b>      | <b>OA-F80</b>      |
|--------------------------------------|-------------------|--------------------|--------------------|--------------------|--------------------|--------------------|--------------------|
| <i>TG</i>                            |                   |                    |                    |                    |                    |                    |                    |
| 42:0                                 | 31.2 $\pm$ 7.9    | 23.6 $\pm$ 4.7     | 30.1 $\pm$ 17.6    | 25.9 $\pm$ 19.6    | 22.8 $\pm$ 18.1    | 22.0 $\pm$ 7.8     | 24.2 $\pm$ 5.7     |
| 44:0                                 | 72.6 $\pm$ 13.5   | 89.3 $\pm$ 9.9     | 99.9 $\pm$ 33.2    | 91.4 $\pm$ 40.7    | 51.4 $\pm$ 31.2    | 51.6 $\pm$ 17.8    | 51.6 $\pm$ 9.6     |
| 46:0                                 | 73.9 $\pm$ 13.1   | 346.8 $\pm$ 33.6   | 331.3 $\pm$ 28.8   | 280.1 $\pm$ 74.7   | 45.4 $\pm$ 22.6    | 46.8 $\pm$ 15.0    | 43.9 $\pm$ 5.1     |
| 46:1                                 | 219.7 $\pm$ 37.9  | 233.6 $\pm$ 28.4   | 249.5 $\pm$ 84.7   | 221.2 $\pm$ 87.0   | 151.4 $\pm$ 100.6  | 139.7 $\pm$ 49.0   | 155.3 $\pm$ 36.9   |
| 46:2                                 | 145.8 $\pm$ 28.5  | 105.8 $\pm$ 19.8   | 117.8 $\pm$ 56.0   | 109.0 $\pm$ 61.0   | 100.5 $\pm$ 72.6   | 95.2 $\pm$ 35.3    | 106.5 $\pm$ 22.6   |
| 46:3                                 | 37.0 $\pm$ 7.7    | 26.0 $\pm$ 4.2     | 27.8 $\pm$ 12.5    | 24.3 $\pm$ 13.2    | 23.4 $\pm$ 15.6    | 23.9 $\pm$ 8.4     | 26.5 $\pm$ 6.0     |
| 48:0                                 | 133.3 $\pm$ 14.4  | 4080.7 $\pm$ 211.8 | 3448.5 $\pm$ 282.7 | 2574.7 $\pm$ 326.6 | 78.1 $\pm$ 17.7    | 63.3 $\pm$ 13.7    | 61.0 $\pm$ 6.4     |
| 48:1                                 | 150.6 $\pm$ 12.9  | 752.3 $\pm$ 112.7  | 595.2 $\pm$ 58.0   | 494.3 $\pm$ 104.9  | 101.8 $\pm$ 40.0   | 92.4 $\pm$ 27.9    | 99.3 $\pm$ 13.6    |
| 48:2                                 | 235.5 $\pm$ 30.8  | 254.2 $\pm$ 28.9   | 247.8 $\pm$ 67.3   | 230.9 $\pm$ 84.4   | 172.9 $\pm$ 85.9   | 159.9 $\pm$ 52.3   | 174.6 $\pm$ 29.7   |
| 48:3                                 | 98.4 $\pm$ 14.2   | 71.3 $\pm$ 11.4    | 77.4 $\pm$ 32.0    | 70.5 $\pm$ 33.2    | 68.4 $\pm$ 42.6    | 65.4 $\pm$ 23.5    | 71.9 $\pm$ 13.9    |
| 48:4                                 | 16.4 $\pm$ 3.0    | 12.6 $\pm$ 2.1     | 13.3 $\pm$ 2.5     | 11.7 $\pm$ 4.3     | 12.0 $\pm$ 6.0     | 11.1 $\pm$ 3.8     | 12.6 $\pm$ 2.9     |
| 48:5                                 | 4.3 $\pm$ 2.9     | 1.9 $\pm$ 1.8      | 1.8 $\pm$ 1.2      | 1.6 $\pm$ 1.2      | 1.8 $\pm$ 1.4      | 1.1 $\pm$ 0.8      | 1.6 $\pm$ 0.9      |
| 50:0                                 | 75.4 $\pm$ 6.8    | 1510.4 $\pm$ 109.2 | 1358.4 $\pm$ 121.0 | 1155.0 $\pm$ 202.8 | 38.9 $\pm$ 1.8     | 39.8 $\pm$ 6.5     | 42.2 $\pm$ 6.8     |
| 50:1                                 | 494.0 $\pm$ 60.6  | 2202.5 $\pm$ 226.8 | 1894.2 $\pm$ 97.7  | 1616.6 $\pm$ 158.9 | 226.0 $\pm$ 26.6   | 211.2 $\pm$ 35.9   | 230.7 $\pm$ 28.3   |
| 50:2                                 | 300.7 $\pm$ 36.9  | 426.8 $\pm$ 58.9   | 384.0 $\pm$ 43.5   | 374.9 $\pm$ 54.5   | 396.4 $\pm$ 18.8   | 365.5 $\pm$ 65.4   | 383.6 $\pm$ 69.7   |
| 50:3                                 | 137.1 $\pm$ 17.3  | 98.6 $\pm$ 13.2    | 97.8 $\pm$ 26.3    | 99.0 $\pm$ 30.8    | 127.6 $\pm$ 25.3   | 110.5 $\pm$ 20.0   | 120.5 $\pm$ 14.5   |
| 50:4                                 | 56.0 $\pm$ 5.3    | 38.3 $\pm$ 6.7     | 36.4 $\pm$ 9.4     | 35.3 $\pm$ 9.5     | 43.8 $\pm$ 10.5    | 38.9 $\pm$ 8.2     | 40.2 $\pm$ 4.4     |
| 50:5                                 | 14.5 $\pm$ 2.9    | 8.1 $\pm$ 2.3      | 6.5 $\pm$ 1.0      | 6.8 $\pm$ 1.3      | 12.0 $\pm$ 1.0     | 9.9 $\pm$ 1.7      | 9.9 $\pm$ 1.9      |
| 50:6                                 | 2.5 $\pm$ 0.8     | 0.3 $\pm$ 0.2      | 0.4 $\pm$ 0.3      | 0.3 $\pm$ 0.2      | 1.2 $\pm$ 0.1      | 1.0 $\pm$ 0.2      | 1.0 $\pm$ 0.2      |
| 52:0                                 | 49.4 $\pm$ 3.9    | 284.7 $\pm$ 12.1   | 251.0 $\pm$ 26.0   | 230.1 $\pm$ 28.0   | 51.7 $\pm$ 33.9    | 97.2 $\pm$ 6.7     | 98.5 $\pm$ 9.7     |
| 52:1                                 | 300.5 $\pm$ 32.0  | 797.3 $\pm$ 89.6   | 756.0 $\pm$ 65.1   | 714.8 $\pm$ 71.8   | 166.3 $\pm$ 29.3   | 152.4 $\pm$ 31.7   | 175.4 $\pm$ 45.9   |
| 52:2                                 | 761.2 $\pm$ 76.7  | 689.1 $\pm$ 66.0   | 650.6 $\pm$ 30.2   | 622.0 $\pm$ 20.6   | 1520.1 $\pm$ 46.1  | 1510.4 $\pm$ 102.3 | 1538.6 $\pm$ 104.9 |
| 52:3                                 | 456.5 $\pm$ 40.3  | 348.8 $\pm$ 42.8   | 287.8 $\pm$ 33.1   | 300.1 $\pm$ 17.7   | 1397.0 $\pm$ 90.0  | 1135.9 $\pm$ 101.2 | 1074.2 $\pm$ 144.0 |
| 52:4                                 | 250.8 $\pm$ 20.0  | 224.9 $\pm$ 126.5  | 237.3 $\pm$ 23.8   | 277.8 $\pm$ 11.4   | 287.9 $\pm$ 67.5   | 233.1 $\pm$ 64.3   | 256.0 $\pm$ 122.1  |
| 52:5                                 | 125.5 $\pm$ 7.8   | 113.5 $\pm$ 26.1   | 93.3 $\pm$ 7.3     | 113.3 $\pm$ 2.2    | 183.9 $\pm$ 8.3    | 147.2 $\pm$ 29.1   | 144.4 $\pm$ 47.0   |
| 52:6                                 | 36.7 $\pm$ 10.5   | 21.2 $\pm$ 6.5     | 17.1 $\pm$ 1.8     | 19.7 $\pm$ 1.8     | 39.6 $\pm$ 2.4     | 31.6 $\pm$ 5.4     | 31.3 $\pm$ 7.8     |
| 52:7                                 | 6.0 $\pm$ 2.6     | 0.8 $\pm$ 0.5      | 0.5 $\pm$ 0.3      | 0.6 $\pm$ 0.4      | 2.3 $\pm$ 0.2      | 1.5 $\pm$ 0.1      | 2.0 $\pm$ 0.5      |
| 52:8                                 | 11.2 $\pm$ 1.0    | 13.6 $\pm$ 3.8     | 12.2 $\pm$ 1.0     | 6.9 $\pm$ 2.7      | 15.0 $\pm$ 1.7     | 10.0 $\pm$ 1.0     | 9.2 $\pm$ 1.5      |
| 54:0                                 | 38.8 $\pm$ 3.2    | 78.0 $\pm$ 1.3     | 78.6 $\pm$ 3.8     | 77.5 $\pm$ 10.3    | 65.9 $\pm$ 57.9    | 149.0 $\pm$ 7.3    | 152.7 $\pm$ 11.4   |
| 54:1                                 | 80.4 $\pm$ 12.4   | 171.6 $\pm$ 19.7   | 165.7 $\pm$ 12.7   | 182.4 $\pm$ 37.4   | 50.4 $\pm$ 8.5     | 45.9 $\pm$ 10.2    | 53.2 $\pm$ 10.7    |
| 54:2                                 | 311.8 $\pm$ 59.8  | 233.7 $\pm$ 28.7   | 211.7 $\pm$ 16.2   | 244.9 $\pm$ 30.2   | 1435.0 $\pm$ 114.3 | 1259.3 $\pm$ 109.3 | 1120.7 $\pm$ 84.8  |
| 54:3                                 | 495.8 $\pm$ 51.0  | 315.9 $\pm$ 26.2   | 286.4 $\pm$ 27.1   | 394.1 $\pm$ 106.7  | 8476.0 $\pm$ 541.4 | 6288.0 $\pm$ 379.4 | 5291.4 $\pm$ 355.7 |
| 54:4                                 | 451.2 $\pm$ 27.1  | 342.8 $\pm$ 33.6   | 260.0 $\pm$ 108.7  | 369.3 $\pm$ 29.6   | 841.8 $\pm$ 23.8   | 688.9 $\pm$ 63.3   | 666.1 $\pm$ 105.9  |
| 54:5                                 | 373.6 $\pm$ 15.1  | 391.4 $\pm$ 82.2   | 284.8 $\pm$ 21.9   | 258.3 $\pm$ 50.9   | 412.6 $\pm$ 65.1   | 349.3 $\pm$ 86.8   | 374.5 $\pm$ 144.5  |
| 54:6                                 | 442.7 $\pm$ 37.0  | 316.1 $\pm$ 51.6   | 261.7 $\pm$ 29.1   | 304.2 $\pm$ 87.8   | 452.4 $\pm$ 137.7  | 360.3 $\pm$ 122.1  | 388.4 $\pm$ 203.9  |
| 54:7                                 | 174.1 $\pm$ 10.5  | 89.8 $\pm$ 14.5    | 73.2 $\pm$ 9.7     | 118.1 $\pm$ 33.5   | 166.3 $\pm$ 55.7   | 129.8 $\pm$ 48.4   | 147.5 $\pm$ 91.2   |
| 54:8                                 | 27.4 $\pm$ 0.6    | 10.0 $\pm$ 1.1     | 9.4 $\pm$ 1.4      | 15.6 $\pm$ 5.1     | 25.1 $\pm$ 8.1     | 19.2 $\pm$ 7.2     | 22.5 $\pm$ 13.9    |
| 54:9                                 | 2.6 $\pm$ 0.4     | 0.2 $\pm$ 0.2      | 0.1 $\pm$ 0.1      | 0.7 $\pm$ 0.3      | 2.4 $\pm$ 0.3      | 1.8 $\pm$ 0.6      | 2.0 $\pm$ 0.9      |
| 56:4                                 | 140.4 $\pm$ 41.4  | 89.4 $\pm$ 20.9    | 84.0 $\pm$ 8.6     | 93.3 $\pm$ 17.8    | 315.6 $\pm$ 20.2   | 278.4 $\pm$ 23.0   | 281.8 $\pm$ 23.0   |
| 56:5                                 | 254.2 $\pm$ 87.1  | 167.6 $\pm$ 38.6   | 153.8 $\pm$ 16.2   | 158.8 $\pm$ 36.9   | 514.6 $\pm$ 43.8   | 427.2 $\pm$ 20.1   | 401.2 $\pm$ 27.5   |
| <b>Li-<br/>pid<br/>Spe-<br/>cies</b> | <b>Control</b>    | <b>PA</b>          | <b>PA-F40</b>      | <b>PA-F80</b>      | <b>OA</b>          | <b>OA-F40</b>      | <b>OA-F80</b>      |
| 56:6                                 | 285.2 $\pm$ 105.4 | 96.9 $\pm$ 27.2    | 84.8 $\pm$ 9.1     | 93.0 $\pm$ 20.8    | 784.5 $\pm$ 102.6  | 637.7 $\pm$ 62.7   | 633.6 $\pm$ 98.3   |

|       |               |                   |                |                |                |                |                |
|-------|---------------|-------------------|----------------|----------------|----------------|----------------|----------------|
| 56:7  | 150.1±58.7    | 37.6±13.2         | 30.9±3.5       | 35.6±8.7       | 283.9±42.4     | 227.1±27.2     | 235.0±44.0     |
| 56:8  | 55.6±24.3     | 10.5±4.4          | 8.9±1.5        | 10.1±2.7       | 60.4±11.2      | 47.0±4.9       | 51.7±8.7       |
| 56:9  | 14.9±6.7      | 3.4±1.7           | 2.6±0.5        | 2.8±0.8        | 10.1±2.0       | 7.9±1.0        | 9.0±1.8        |
| 56:10 | 3.5±2.0       | 0.4±0.4           | 0.3±0.1        | 0.3±0.2        | 2.8±0.6        | 2.0±0.3        | 2.3±0.7        |
| 56:11 | 0.3±0.2       | 0.0 ±0.0          | 0.0±0.0        | 0.0±0.0        | 0.1±0.1        | 0.0±0.0        | 0.0±0.0        |
| 58:6  | 187.0±68.4    | 43.4±12.1         | 40.3±5.5       | 47.9±11.7      | 501.9±48.9     | 442.9±32.8     | 460.8±38.8     |
| 58:7  | 177.5±67.0    | 19.1±6.6          | 17.6±1.9       | 23.6±7.4       | 831.4±91.0     | 683.3±53.3     | 673.7±99.0     |
| 58:8  | 99.9±39.8     | 13.0±5.4          | 10.7±1.8       | 14.3±4.4       | 500.4±65.5     | 400.3±44.9     | 389.5±67.3     |
| 58:9  | 47.5±20.6     | 10.0±4.7          | 8.0±1.1        | 9.8±3.2        | 42.7±7.1       | 32.3±3.9       | 35.6±7.0       |
| 58:10 | 26.1±11.7     | 8.7±4.0           | 6.7±1.2        | 7.8±1.9        | 17.9±4.2       | 13.7±1.8       | 15.0±2.2       |
| 58:11 | 7.9±3.8       | 2.1±1.1           | 1.7±0.3        | 1.6±0.5        | 3.9±0.9        | 3.0±0.5        | 3.8±1.0        |
| 58:12 | 1.0±0.6       | 0.0±0.0           | 0.0±0.0        | 0.0±0.0        | 0.2±0.1        | 0.1±0.1        | 0.2±0.1        |
| 60:10 | 45.1±18.8     | 7.2±5.4           | 6.4±1.0        | 7.6±2.0        | 46.1±8.0       | 36.1±4.9       | 39.6±8.1       |
| 60:11 | 32.6±14.5     | 6.7±3.3           | 5.1±0.9        | 6.0±1.6        | 30.3±5.8       | 23.3±3.2       | 26.5±4.9       |
| 60:12 | 12.0±5.4      | 2.7±1.3           | 1.9±0.5        | 2.2±0.6        | 8.2±1.9        | 6.4±0.8        | 7.0±1.7        |
| 60:13 | 1.5±0.8       | 0.0±0.0           | 0.0±0.0        | 0.0±0.0        | 0.5±0.3        | 0.2±0.1        | 0.5±0.1        |
| 60:14 | 0.1±0.0       | 0.0±0.1           | 0.0±0.0        | 0.1±0.1        | 0.1±0.0        | 0.1±0.1        | 0.2±0.1        |
| 62:12 | 16.1±7.6      | 0.3±0.3           | 0.1±0.1        | 0.2±0.1        | 19.7±3.7       | 14.7±2.5       | 16.8±3.4       |
| 62:13 | 7.4±3.8       | 0.3±0.4           | 0.1±0.0        | 0.2±0.1        | 7.5±1.9        | 5.3±0.9        | 6.5±1.4        |
| 62:14 | 1.1±0.7       | 0.0±0.0           | 0.0±0.0        | 0.0±0.0        | 0.3±0.2        | 0.1±0.1        | 0.5±0.2        |
| FFA   |               |                   |                |                |                |                |                |
| 14:0  | 2357.3±209.9  | 2192.6±136.8      | 2270.2±192.3   | 2358.2±263.1   | 2644.3±712.9   | 2492.6±164.7   | 2356.1±177.3   |
| 14:1  | 96.8±55.0     | 89.8±25.8         | 62.8±5.6       | 65.4±19.5      | 61.1±16.2      | 55.5±4.4       | 59.8±31.6      |
| 16:0  | 18825.1±549.0 | 18409.8±<br>593.2 | 18492.3±2697.5 | 22532.3±1430.6 | 13511.3±1263.3 | 19891.6±1689.5 | 20752.8±2303.5 |
| 16:1  | 787.0±292.7   | 896.2±226.7       | 638.8±89.7     | 515.8±170.3    | 623.3±188.4    | 596.3±76.9     | 574.9±225.4    |
| 16:2  | 11.1±5.3      | 9.4±2.6           | 6.7±1.6        | 6.9±3.3        | 6.9±2.4        | 7.9±1.4        | 7.1±2.8        |
| 18:0  | 24023.1±977.0 | 22637.5±1255.6    | 23549.4±2755.2 | 25729.6±1665.5 | 23122.2±4510.5 | 26180.4±2597.8 | 25890.0±1493.0 |
| 18:1  | 1917.6±319.1  | 1926.6±412.1      | 1622.6±303.8   | 1428.3±444.5   | 4162.5±310.6   | 3144.6±167.0   | 2861.6±262.1   |
| 18:2  | 1237.2±237.3  | 887.9±267.6       | 978.7±255.9    | 862.3±155.2    | 447.2±371.8    | 1250.5±386.7   | 678.2±144.3    |
| 18:3  | 104.3±22.4    | 74.7±25.2         | 76.7±26.0      | 65.0±13.1      | 56.5±18.7      | 102.5±33.8     | 53.2±11.1      |
| 20:0  | 1200.9±100.7  | 918.7±141.1       | 980.8±222.8    | 892.5±66.0     | 808.2±122.1    | 1184.4±227.1   | 840.0±104.3    |
| 20:1  | 117.2±27.2    | 99.3±28.0         | 91.4±18.0      | 85.5±29.4      | 208.4±12.6     | 175.2±15.0     | 176.2±7.5      |
| 20:2  | 50.1±21.7     | 42.5±10.5         | 37.3±9.3       | 34.6±18.1      | 37.2±14.8      | 36.0±5.1       | 46.1±13.5      |
| 20:3  | 42.0±3.6      | 65.2±22.1         | 57.6±17.8      | 64.7±23.9      | 45.1±3.9       | 34.8±2.4       | 43.2±5.9       |
| 20:4  | 130.6±49.2    | 206.4±53.9        | 177.3±48.6     | 196.1±81.9     | 186.8±26.6     | 127.5±12.5     | 161.7±42.0     |
| 20:5  | 20.2±6.6      | 36.6±8.8          | 31.5±7.5       | 37.3±15.3      | 25.6±4.9       | 15.9±1.0       | 19.5±5.3       |
| 22:6  | 44.2±15.9     | 54.6±14.3         | 49.2±12.2      | 55.8±21.1      | 48.2±4.4       | 33.3±3.6       | 45.8±14.0      |

**Table S2.** Sequence of primers for quantitative real-time PCR.

| Target | Primer sequence (5'-3')                                | Accession number |
|--------|--------------------------------------------------------|------------------|
| GAPDH  | F: ACCCAGAAGACTGTGGATGG<br>R: CAGTGAGCTTCCCGTTCAG      | NM_002046.7      |
| ATGL   | F: AGACAAACTGCCACTCTATGAG<br>R: GAACTGGATGCTGGTGTTG    | NM_020376.4      |
| ACC    | F: GGAACATCCCTACGCTAAACAG<br>R: CTGACAAGGTGGAGTGAATGAG | NM_198838.2      |
| FAS    | F: ACAGGGACAACCTGGAGTTCT<br>R: CTGTGGTCCCACCTTGATGAGT  | NM_004104.5      |
| SCD-1  | F: GGGAGTGTGTCTGCTGAGTAAG<br>R: GCAAGGACTGTTAGAAATCCG  | NM_005063.5      |
